# Supplementary material for: Concomitant Urethral Duplication, Posterior Urethral Valves, Ipsilateral Seminal Vesicle Cyst, and Urethral Vasal Reflux, a Case Report Presenting as Recurrent Epididymo-Orchitis and Testis Abscesses: Novel Management and Review of the Literature
Source: Research Square preprint supplement (doi:10.21203/rs.3.rs-7671655/v1), 2025-12-30
Supplement: Supplementary file 1 [file 1d25617ac8a1923703eac68f.docx]

**CARE Checklist –: European Journal of Medical Case Reports**

| **Item** | **Topic** | **Checklist item description** | **Line/page** |
| --- | --- | --- | --- |
| 1 | **Title** | The words “case report” should be in the title along with the area of focus | Line 3/ page 1 |
| 2 | **Keywords** | Four to seven key words—include “case report” as one of the key words | Line 38/ page 2 |
| 3a | **Abstract** | **Background:** What does this case report add to the medical literature? | Line 24,25/page 2 |
| 3b | **Case Presentation:** chief complaint, diagnoses, interventions, and outcomes | Line 26- 29/ page 2 |
| 3c | **Conclusion:** What is the main “take-away” message from this case? | Line 34, 35/ page 2 |
| 4 | **Introduction/background** | The current standard of care and contributions of this case—with references (1-2 paragraphs) | Line 43-51/ page 3 |
| 5 | **Timeline** | Information from this case report organized into a timeline (table or figure) | Figure 3 |
| 6a | **Patient Information** | De-identified demographic and other patient or client specific information | Line 53/ page 3 |
| 6b | Chief complaint—what prompted this visit? | Line 54/ page 3 |
| 6c | Relevant history including past interventions and outcomes | Line 57, 58/ page 3 |
| 7 | **Physical Exam** | Relevant physical examination findings | Line 55, 56/ page 3 |
| 8a | **Diagnostic** | Evaluations such as surveys, laboratory testing, imaging, etc. | Line 58-73/ page 2, 3 |
| 8b | **Assessment** | Diagnostic reasoning including other diagnoses considered and challenges | Line 106-108/page 5 |
| 8c | Consider tables or figures linking assessment, diagnoses and interventions | Line 353/ page 21 |
| 8d | Prognostic characteristics where applicable | Line 79-81/ page 4 |
| 9a | **Interventions** | Types such as life-style recommendations, treatments, medications, surgery | Line 76-95/ page 4 |
| 9b | Intervention administration such as dosage, frequency and duration | Line 76-95/ page 4 |
| 9c | Note changes in intervention with explanation | Line 76-95/ page 4 |
| 9d | Other concurrent interventions | Line 76-95/ page 4 |
| 10a | **Follow-up and** | Clinician assessment (and patient or client assessed outcomes when appropriate) | Line 96-100/ page 5 |
| 10b | **Outcomes** | Important follow-up diagnostic evaluations | Line 96-100/ page 5 |
| 10c | Assessment of intervention adherence and tolerability, including adverse events | Line 96-100/ page 5 |
| 11a | **Discussion** | Strengths and limitations in your approach to this case | Line 155-162/ page 8 |
| 11b | Specify how this case report informs practice or Clinical Practice Guidelines (CPG) | Line 155-162/ page 8 |
| 11c | How does this case report suggest a testable hypothesis? | Line 163-169/page 8 |
| 11d | Conclusions and rationale | Line 163-169/page 8 |
| 12 | **Patient Perspective** | When appropriate include the assessment of the patient or client on this episode of care | Line 96-100/page |
| 13 | **Informed Consent** | Informed consent from the person who is the subject of this case report | Line 199/ page 10 |
| 14 | **Additional Information** | Acknowledgement section; Competing Interests (Conflict of Interests statement); IRB approval, (Ethical Committee Approval) when required | Competing interest: line 204/ page 10. Ethics approval and consent to participate: line 193-196/ page 10 |

**Summary of the case**

| 1 | **Patient (gender, age)** | Male, 8 years old |
| --- | --- | --- |
| 2 | **Final Diagnosis** | Concomitant Urethral Duplication, Posterior Urethral Valves, Ipsilateral Seminal Vesicle Cyst, and Urethral Vasal Reflux |
| 3 | **Symptoms** | Recurrent right-sided Epididymo-orchitis and Testis Abscesses |
| 4 | **Medications** | Deflux® (used as a bulking agent, not a systemic medication) |
| 5 | **Clinical Procedure** | PUV fulguration, Bladder Neck Incision (BNI), Bilateral Vas Clipping (with neovascular preservation), Vesicostomy Closure, and Excision of the Ectopic Urethra with Urethrorrhaphy |
| 6 | **Specialty** | Pediatric Urology |
