# Supplementary material for: Concomitant Urethral Duplication, Posterior Urethral Valves, Ipsilateral Seminal Vesicle Cyst, and Urethral Vasal Reflux, a Case Report Presenting as Recurrent Epididymo-Orchitis and Testis Abscesses: Novel Management and Review of the Literature
Source: Research Square preprint supplement (doi:10.21203/rs.3.rs-7671655/v1), 2025-12-30
Supplement: Supplementary file 2 [file b32bd0697357e703772cf9f1.docx]

Table 1.

| study | Type of Study | Clinical presentation | Coordinated complication | Diagnostic tools | treatment | Follow-up | Age at diagnosis (year) | Age at treatment (year) |
| --- | --- | --- | --- | --- | --- | --- | --- | --- |
| Pati 2023 (21) | Case report | Pass urine per anus since birth | Left ectopic kidney, bilateral VUR | Ultrasonogram,  Digital rectal, functional nuclear imaging scan, voiding cystourethrogram, Cystoscopy,  Uroflowmetry | PADUA | 3 years | 9 | 9 |
| Lena 2022 (22) | Case series | Urine leak, Recurrent UTIs | Renal agenesis, sacral agenesis, clubfoot | MRI, urethrocystoscopy, urodynamic examination, VCUG | Excision of the ventral urethra | - | 3.2 | 8.5 |
| Lena 2022 (22) | Case series | Urine leak, Recurrent UTIs | Hypospadias, renal agenesis, penoscrotal transposition | VCUG, cystoscopy, spinal cord MRI, and urodynamic evaluation. | Excision of dorsal urethra, TIPU | - | 0.4 | 1.4 |
| Lena 2022 (22) | Case series | Pyelonephritis | Duplex collecting system, megaureter | VCUG, uroflowmetry | No surgical correction | - | 2 | - |
| Lena 2022 (22) | Case series | Urine leak, Recurrent UTIs | VACTERL syndrome (EA, sacral dysmorphism, Fallot tetralogy, PROM), hypospadias, cholecystic malformation | Cystoscopy,  Urodynamic examination, MRI | Excision of dorsal urethra, TIPU | - | 3 | 3.1 |
| Tlili 2021 (23) | Case report | Scrotal fistula leakage of purulent fluid | none | Scrotal ultrasound, Voiding cystourethrography, MRI. | Excision of the accessory urethra | 16 months | 32 | 32 |
| Ratan 2021 (24) | Case report | Dribbling urine from the mid-scrotum and UTIs | Lack of anal orifice, diverticulum with intestinal mucosa | Cologram, Ultrasound, micturating cystourethrogram, cystoscopy | PSARP, ablation of diverticulum mucosa, excision of accessory urethra | 5 years | 12 | 12 |
| Lorenz 2021 (25) | Case series | Imperforated anus and recto-perineal fistula | Imperforated anus | VCUG, endoscopy, | PSARP and reconstruction urethra | - | - | 6 months |
| Lorenz 2021 | Case series | Abdominal distention postnatally | Additional renal and cardiac anomalies | VCUG, uroflowmetry,  endoscopy | ASTRA and dilate the orthotopic urethra and buccal mucosa graft | - | - | 6 weeks |
| Saran 2020 (26) | Case report | Voiding urine per rectum | bifid scrotum, dorsal hypoplastic urethra | micturating cystourethrogram, ultrasonography, excretory urography | Excision of dorsal urethra, urethroplasty | - | 11 | 11 |
| Saran 2020 (26) | Case report | voiding urine per rectum | Right hypoplastic kidney, hypoplastic urethra | excretory urography, Micturating cystourethrogram, Urethrocystoscopy | Mobilizing and anastomosing of the ventral urethra from the rectum to the patent distal part of the dorsal urethra in an end‑to‑end fashion. | - | 14 | 14 |
| Kang 2020 (27) | Case series | Double stream of urine | VACTERL syndrome | - | Urethroplasty with BM VIU | - | - | 3 years and 1 month |
| Kang 2020 (27) | Case series | Double stream of urine | Anorectal malformation | - | Urethroplasty with BM open urethrotomy | - | - | 2 years and 4 months |
| Guglielmetti 2020(28) | Case series | Passing urine from the anus | Small ASD, PDA; tracheoesophageal fistula (Pseudo VACTERL) | Cystoscopy, cystography | Three-staged procedure  1-Separation of the urethra from the rectal wall, 2-anoplasty, 3-urethral reconstruction | - | - | 13 months |
| Guglielmetti 2020 (28) | Case series | cystitis | Right kidney failure, crossed dystopia of the kidney (left to right) | Ultrasound, VCUG, renal scintigraphy | Three-staged procedure  1-Separation of the urethra from the rectal wall, 2-anoplasty, 3-urethral reconstruction) | - | - | 3 months |
